# Supplementary material
Source: publisher site journal article supplement (https://www.dovepress.com/article/545482)

Figure S1. GO and KEGG for 32 differentially expressed genes.


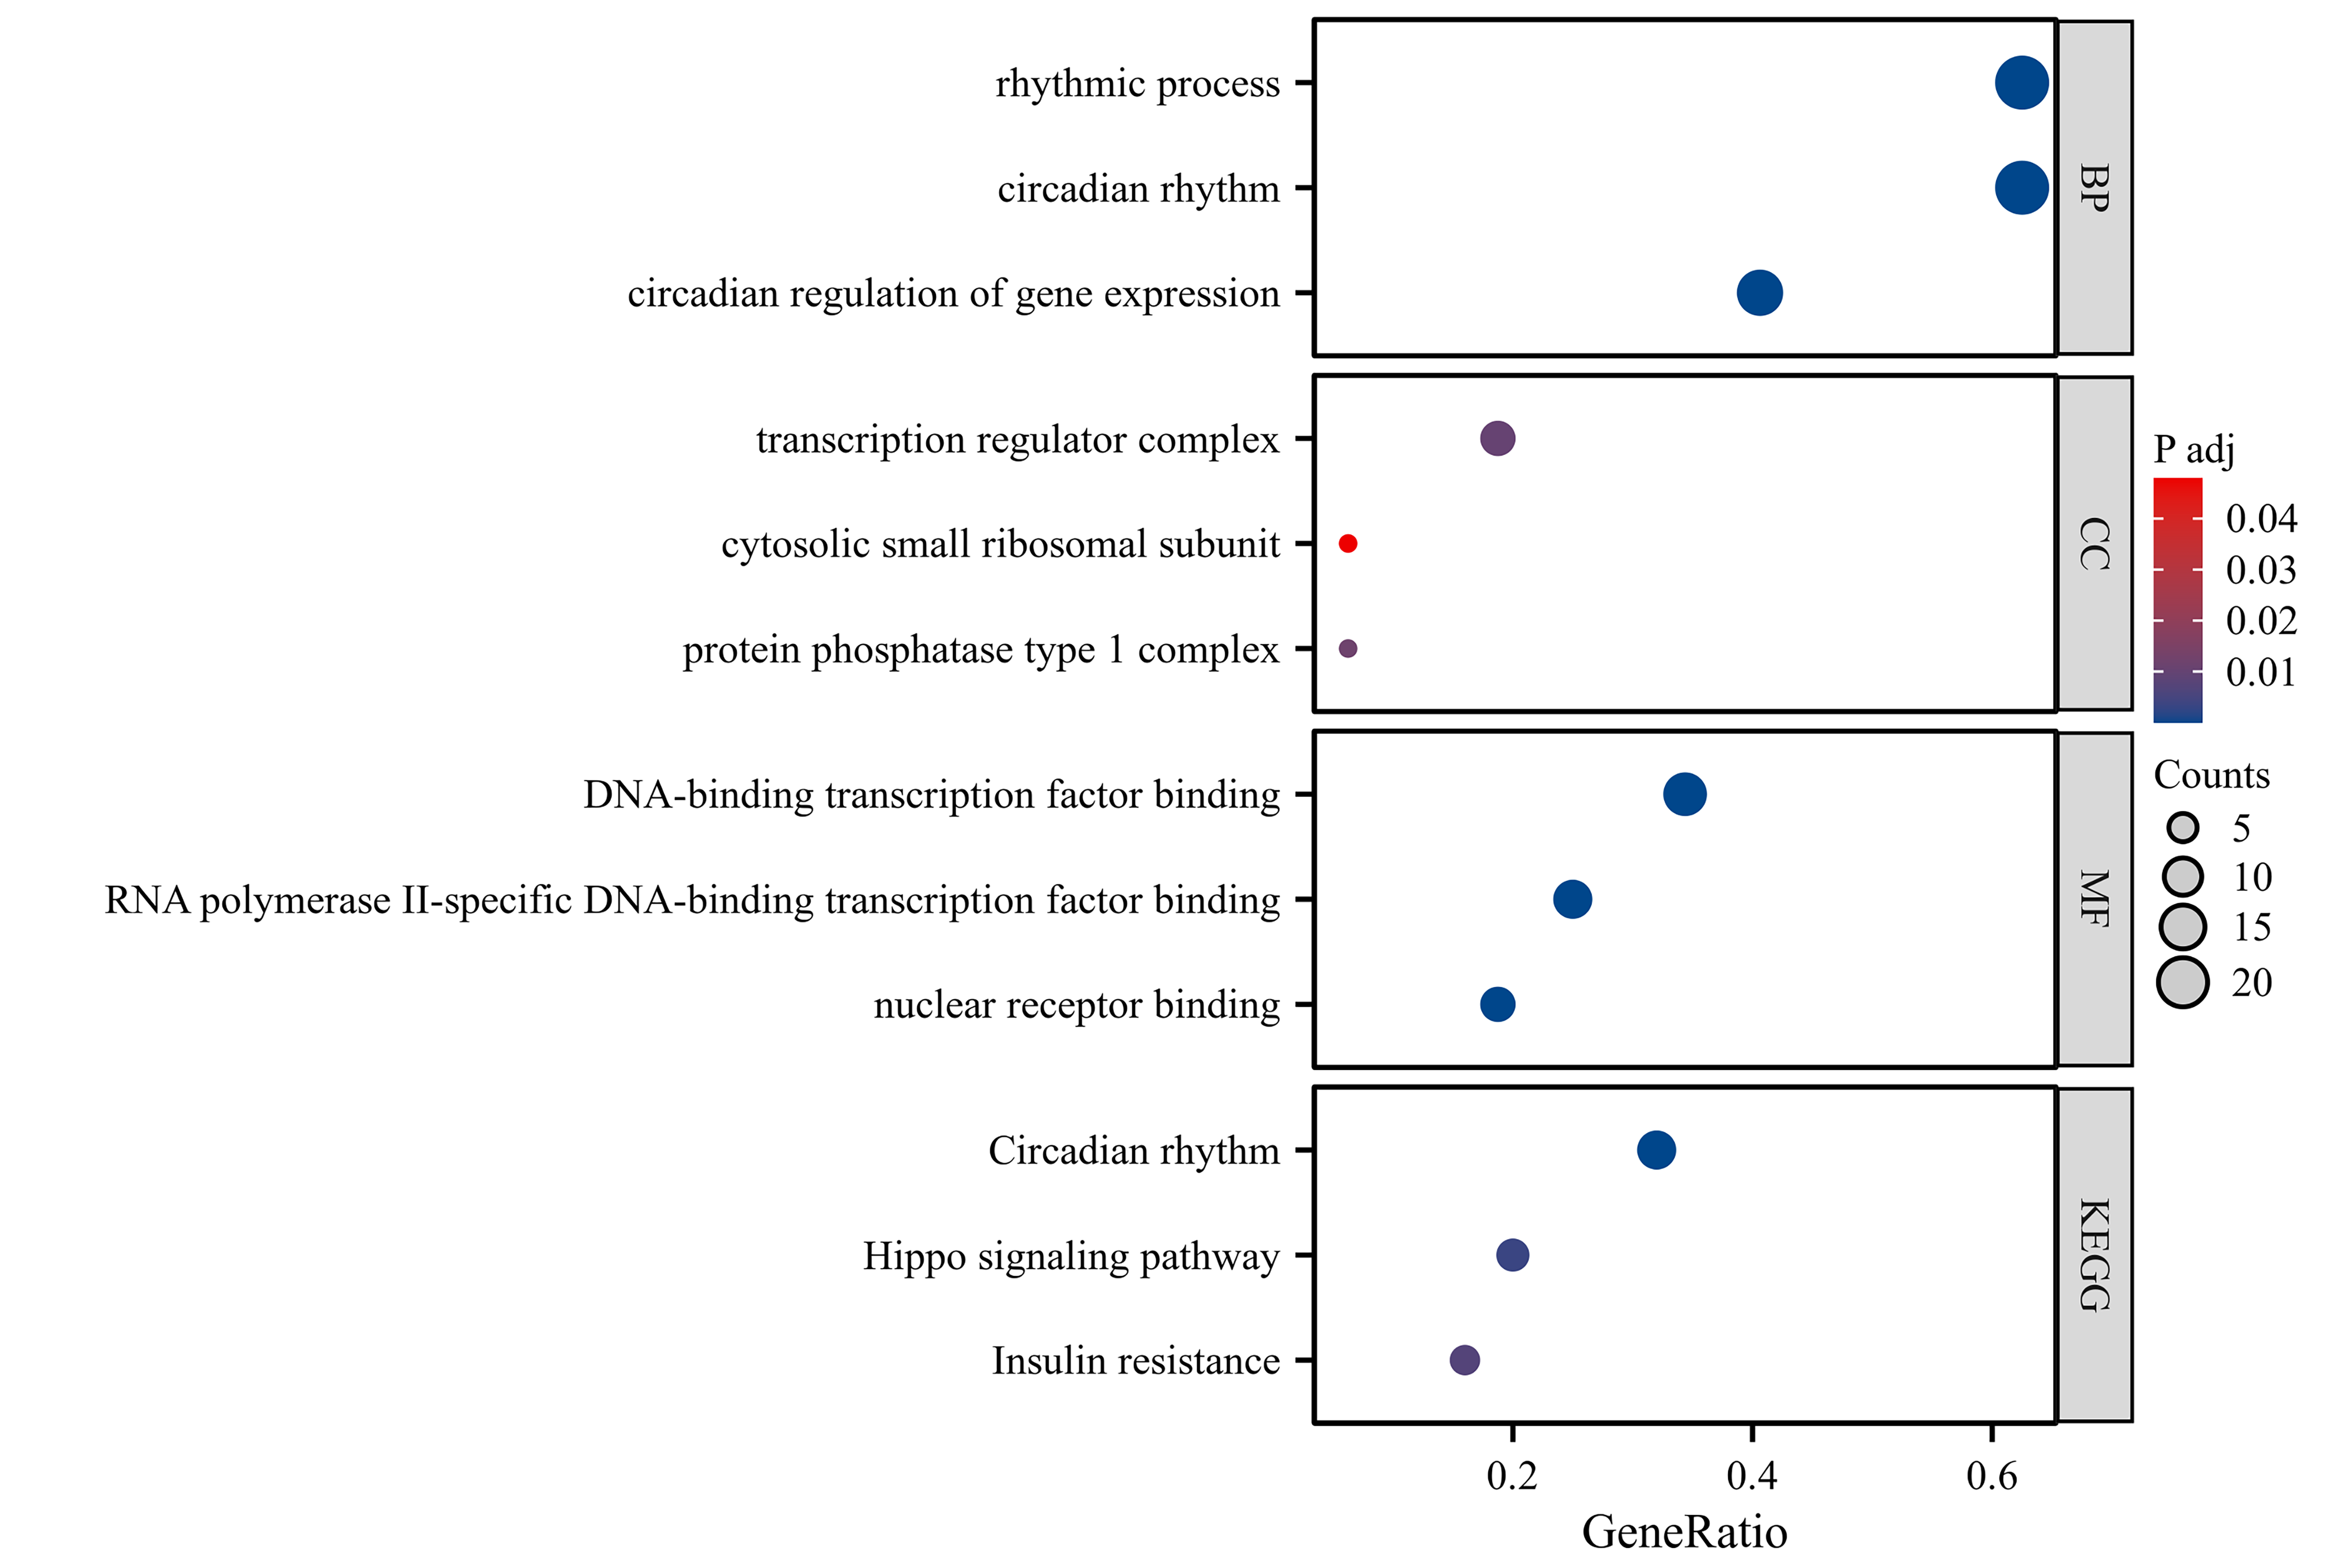


Figure S2. Prognostic analysis of eight genes in patients with hepatocellular carcinoma. (A) PPARGC1A gene expression analysis for prognosis in HCC patients. (B) F7 gene expression analysis for prognosis in HCC patients. (C) ELOVL3 gene expression analysis for prognosis in HCC patients. (D) CSNK1E gene expression analysis for prognosis in HCC patients. (E) CRTC2 gene expression analysis for prognosis in HCC patients. (F) NPAS2 gene expression analysis for prognosis in HCC patients. (G) PPP1CC gene expression analysis for prognosis in HCC patients. (H) SKP1 gene expression analysis for prognosis in HCC patients.


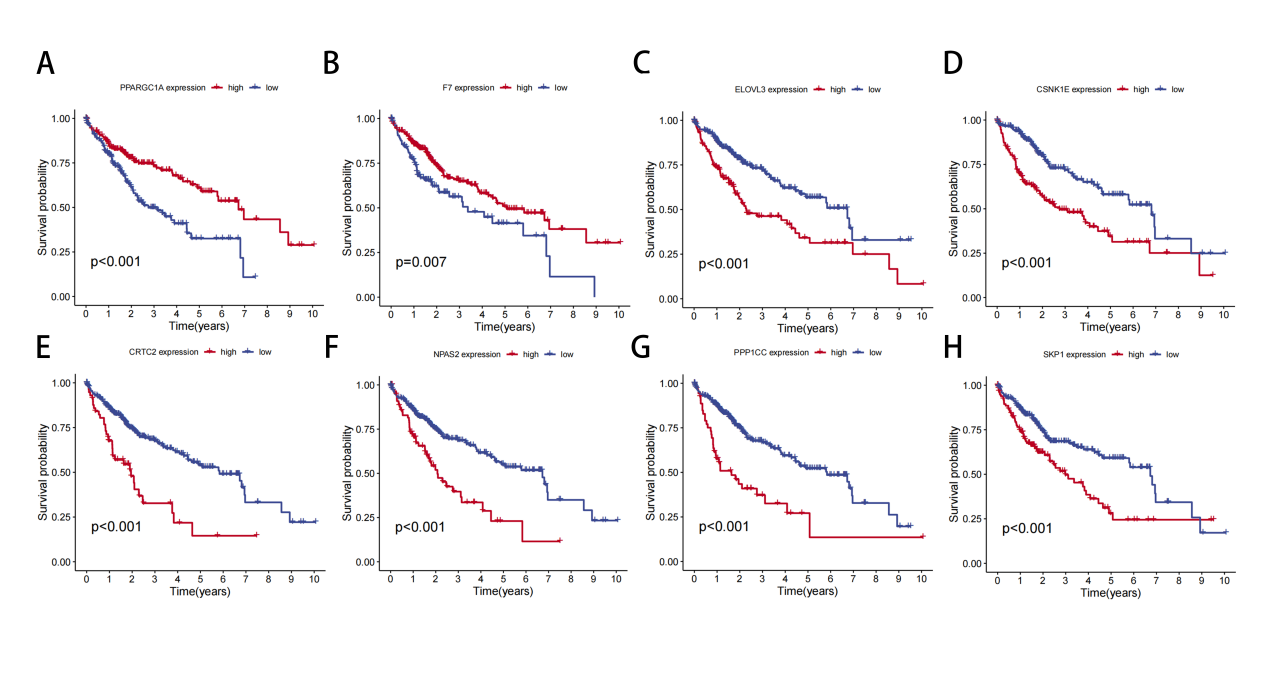


Figure S3. Confusion matrix of the radiomics model.


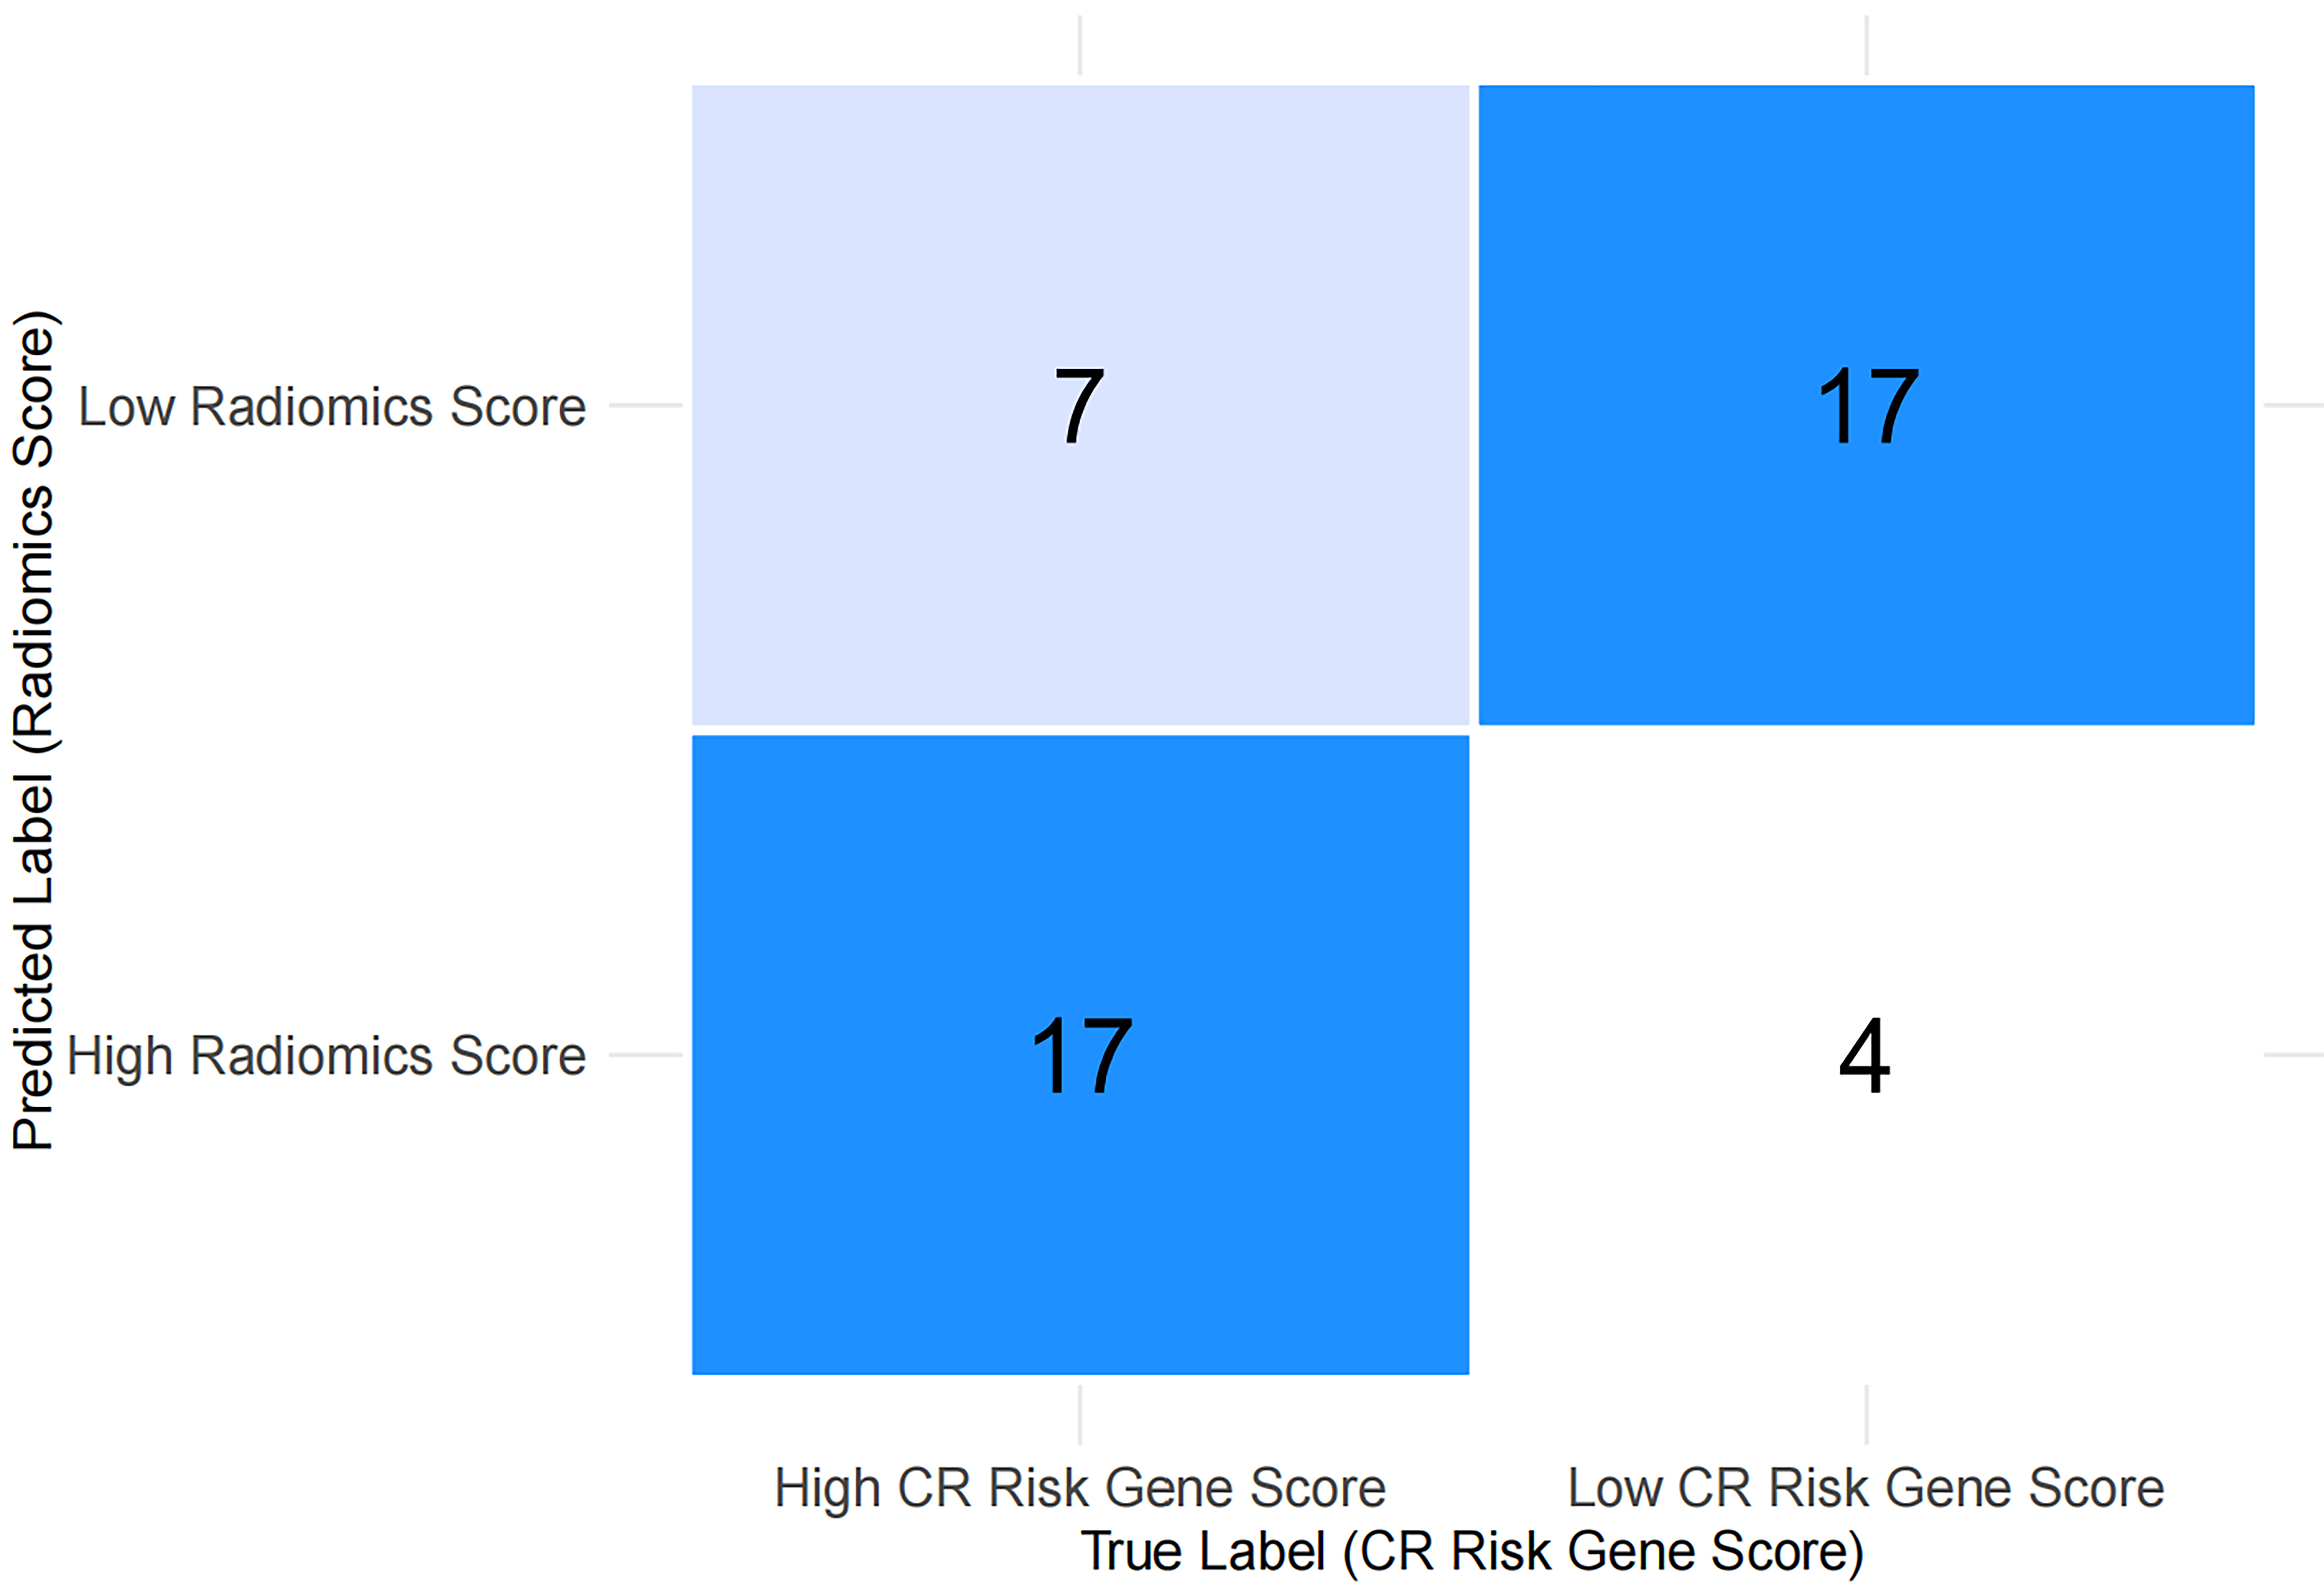

Supplement: Supplementary file 1 [file Supplementary%20Material.docx]
